# Supplementary material for: Epigenetic clock acceleration is linked to age-at-onset of idiopathic and LRRK2 Parkinson’s disease
Source: bioRxiv or medRxiv preprint supplement (doi:10.1101/2022.02.04.22270486), 2022-02-06
Supplement: Supplementary file [file media-1.pdf]

## Supplementary materials

### **Epigenetic clock acceleration is linked to age-at-onset of idiopathic and *LRRK2*-related Parkinson's disease**

Xuelin Tang <sup>1\*</sup>, Paulina Gonzalez-Latapi <sup>2,3\*</sup>, Connie Marras <sup>2,4</sup>, Naomi P. Visanji <sup>2,5-7</sup>,  
Wanli Yang <sup>1</sup>, Christine Sato <sup>5</sup>, Anthony E. Lang <sup>2,4,7</sup>, Ekaterina Rogaeva <sup>4,5#</sup>, Ming  
Zhang <sup>1,8,9#</sup>

<sup>1</sup> The First Rehabilitation Hospital of Shanghai, Department of Medical Genetics, School of Medicine, Tongji University, 200090, Shanghai, China

<sup>2</sup> Edmond J. Safra Program in Parkinson's disease and Morton and Gloria Shulman Movement Disorders Clinic, Toronto Western Hospital, Toronto, Canada

<sup>3</sup> Ken and Ruth Davee Department of Neurology, Northwestern University, Feinberg School of Medicine, Chicago, Illinois, USA.

<sup>4</sup> Division of Neurology, University of Toronto, Toronto, Ontario, Canada

<sup>5</sup> Tanz Centre for Research in Neurodegenerative Diseases, University of Toronto, 60 Leonard Ave., Toronto, ON, Canada, M5T 2S8

<sup>6</sup> Department of Laboratory Medicine and Pathobiology, University of Toronto, Toronto, Ontario, Canada

<sup>7</sup> Krembil Brain Institute, Toronto, Ontario, Canada

<sup>8</sup> Clinical Center for Brain and Spinal Cord Research, Tongji University, Shanghai, China

<sup>9</sup> Institute for Advanced Study, Tongji University, Shanghai, China

\* These authors contributed equally

# Correspondence should be addressed to:

Ming Zhang (mingzhang@tongji.edu.cn)

The First Rehabilitation Hospital of Shanghai, Department of Medical Genetics, School of Medicine, Tongji University, 200090, Shanghai, China

Tel: +86 021 62933585

Or

Ekaterina Rogaeva (ekaterina.rogaeva@utoronto.ca)

Tanz Centre for Neurodegenerative Diseases, University of Toronto, 60 Leonard Avenue, Toronto, ON, Canada, M5T 2S8

Tel: (416)507-6872; Fax: (416) 603-6435

**Running title:** Epigenetic clock in Parkinson's disease

**Supplementary Table 1. Summary of the cox proportional hazards analysis when considering DNAm-age acceleration as continuous or categorized (into three groups) variants.**

|                                                      | Continuous | Categorized <sup>a</sup> |
|------------------------------------------------------|------------|--------------------------|
| <i>LRRK2</i> cohort at baseline*                     |            |                          |
| p-value                                              | 7.44E-10   | 1.68E-6                  |
| HR                                                   | 1.16       | 2.29                     |
| 95%CI                                                | 1.11-1.21  | 1.62-3.20                |
| <i>LRRK2</i> cohort at 3-year follow-up*             |            |                          |
| p-value                                              | 1.24E-10   | 1.65E-6                  |
| HR                                                   | 1.19       | 2.56                     |
| 95%CI                                                | 1.13-1.26  | 1.74-3.75                |
| Manifesting G2019S-carriers at baseline <sup>Δ</sup> |            |                          |
| p-value                                              | 2.19E-12   | 1.70E-10                 |
| HR                                                   | 1.18       | 3.83                     |
| 95%CI                                                | 1.13-1.24  | 2.53-5.78                |
| Idiopathic Parkinson's Disease patients <sup>#</sup> |            |                          |
| p-value                                              | 3.76E-5    | 0.0145                   |
| HR                                                   | 1.09       | 1.53                     |
| 95%CI                                                | 1.05-1.14  | 1.09-2.16                |

\*Adjusted for sex, relatedness and blood cell count (CD8T, CD4T, B cells, and Gran cells).

<sup>Δ</sup>Adjusted for sex, relatedness, interval between age at onset and age at sample collection and blood cell count (CD8T, CD4T, B cells, and Gran cells).

<sup>#</sup> Adjusted for sex, interval between age at onset and age at sample collection and blood cell count (CD8T, CD4T, B cells, and Gran cells).

<sup>a</sup> we created different indicator number for each group (0 for slowing aging, 1 for normal aging and 2 for fast aging).

**Supplementary Table 2. Clinical characteristics of phenoconverter (G2019S-carriers #54215).**

|                                     | Baseline | 1-year follow-up | 2-year follow-up | 3-year follow-up |
|-------------------------------------|----------|------------------|------------------|------------------|
| MDS-UPDRS Part I                    | 6        | 10               | 10               | 10               |
| MDS-UPDRS Part II                   | 4        | 3                | 4                | 6                |
| MDS-UPDRS Part III                  | 4        | 15               | 25               | 30               |
| Hoehn & Yahr                        | Stage 0  | Stage 1          | Stage 0          | Stage 3          |
| MoCA                                | NA       | 25               | 25               | 20               |
| DNAm-age acceleration values(years) | -6.65    | -3.92            | -1.22            | -2.07            |

NA = not applicable.

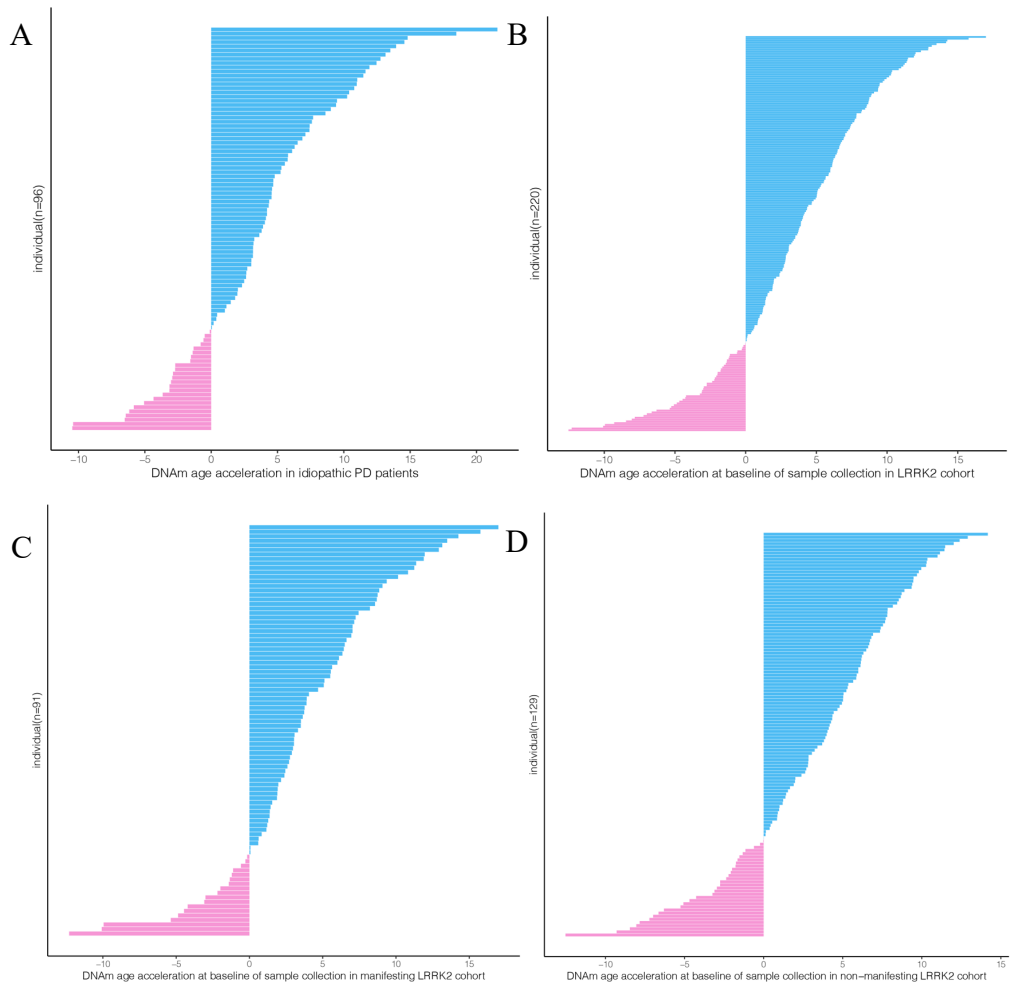

**Supplementary Fig 1.** The distribution of DNAm-age acceleration in 96 idiopathic PD patients (A), 220 G2019S-carriers at baseline (B), including 91 manifesting (C) and 129 non-manifesting (D) G2019S-carriers.

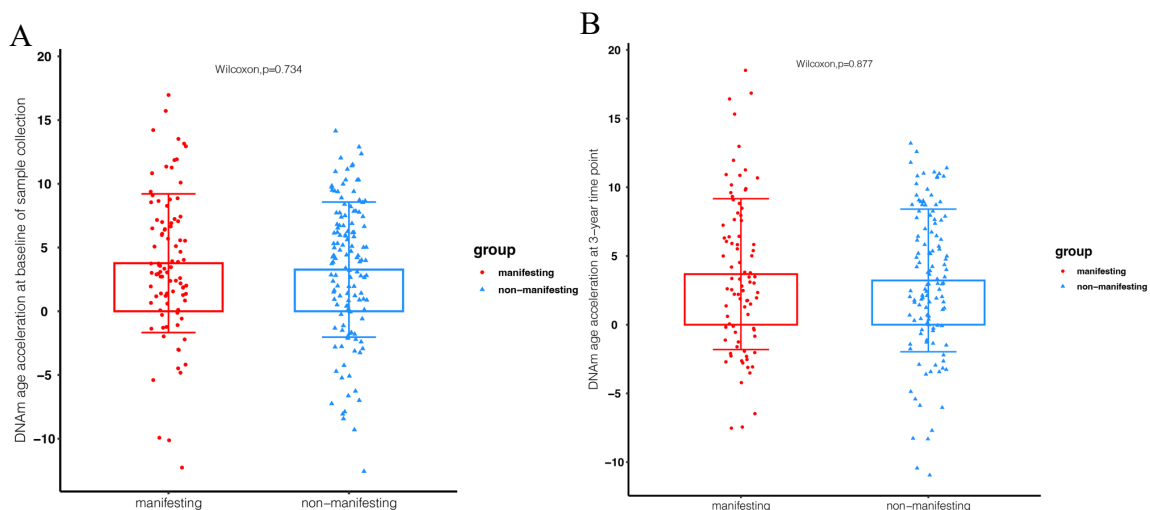

**Supplementary Fig 2.** Bar/scatter charts of DNAm-age acceleration in G2019S-carriers at baseline and the 3-year time-point of sample collection. There is no significant difference between DNAm-age acceleration for manifesting and non-manifesting G2019S-carriers at **A.** baseline ( $p=0.73$ , Wilcoxon test) or **B.** the 3-year time-point ( $p=0.88$ , Wilcoxon test).

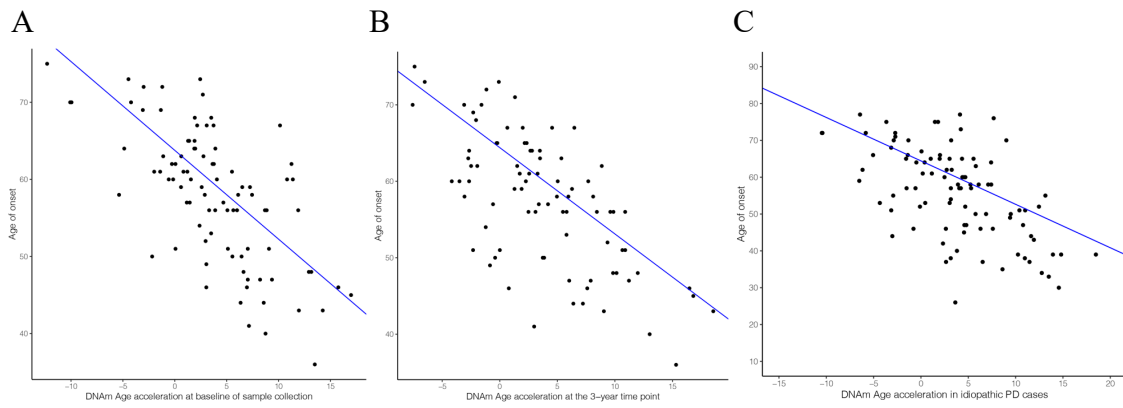

**Supplementary Fig 3.** Scatter plot of DNAm-age acceleration and age-at-onset in PD patients with or without an *LRRK2* mutation. The association between DNAm-age acceleration and age-at-onset in **A.** G2019S-carriers at baseline sample collection ( $p=2.25E-15$ ,  $B=-1.15$ ,  $R^2=0.51$ ,  $n=91$ ); **B.** G2019S-carriers at 3-year follow-up ( $p=1.89E-14$ ,  $B=-1.17$ ,  $R^2=0.52$ ,  $n=86$ ). **C.** idiopathic PD patients ( $p=5.39E-9$ ,  $B=-1.19$ ,  $R^2=0.30$ ,  $n=96$ ). Linear regression analyses were adjusted for sex and interval.

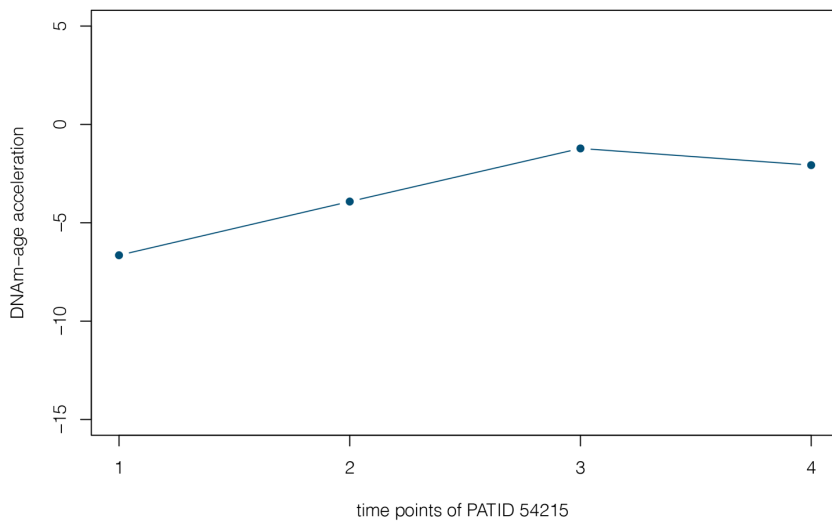

**Supplementary Fig 4.** DNAm-age acceleration of the phenoconverter (patient #54215) at four time points, who was non-manifesting at up to 2-year follow-up (time-points 1-3), but was diagnosed with Parkinson's Disease by 3-year follow-up (time-point 4).

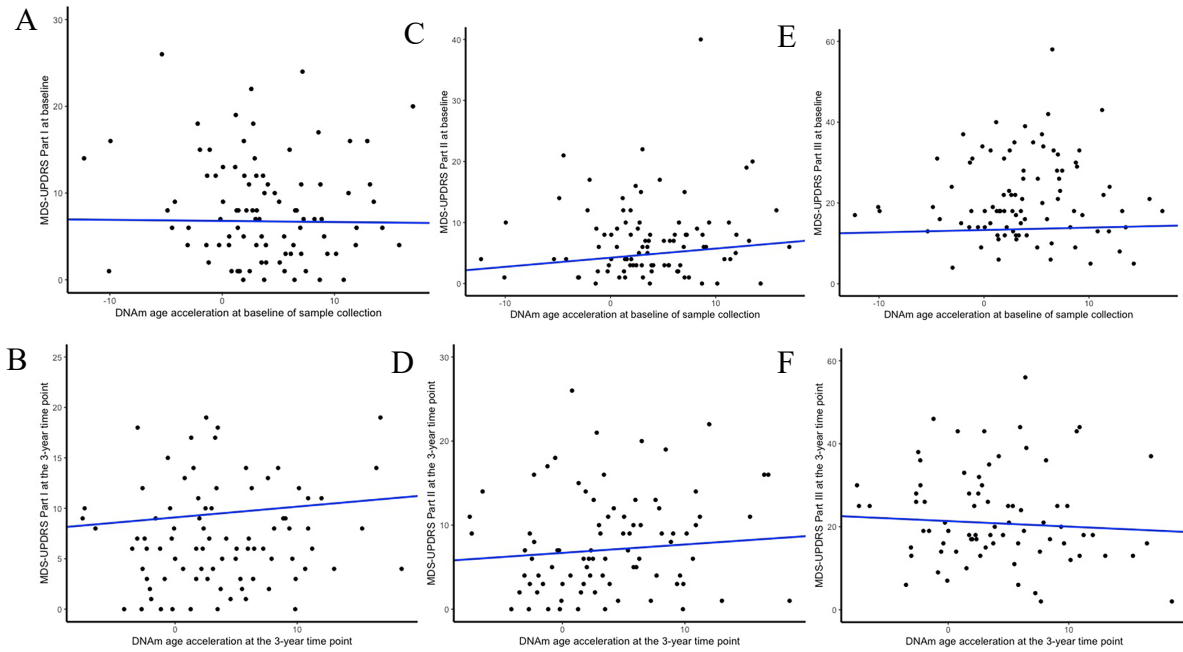

**Supplementary Fig 5.** Scatter plots of DNAm-age acceleration and UPDRS Part I-III at baseline (n=91) and the 3-year time point (n=85 for part I and part II, n=77 for part III) for *LRRK2* G2019S-carriers. DNAm-age acceleration is not significantly associated with UPDRS ( $p > 0.05$ , adjusted for sex, family and interval).

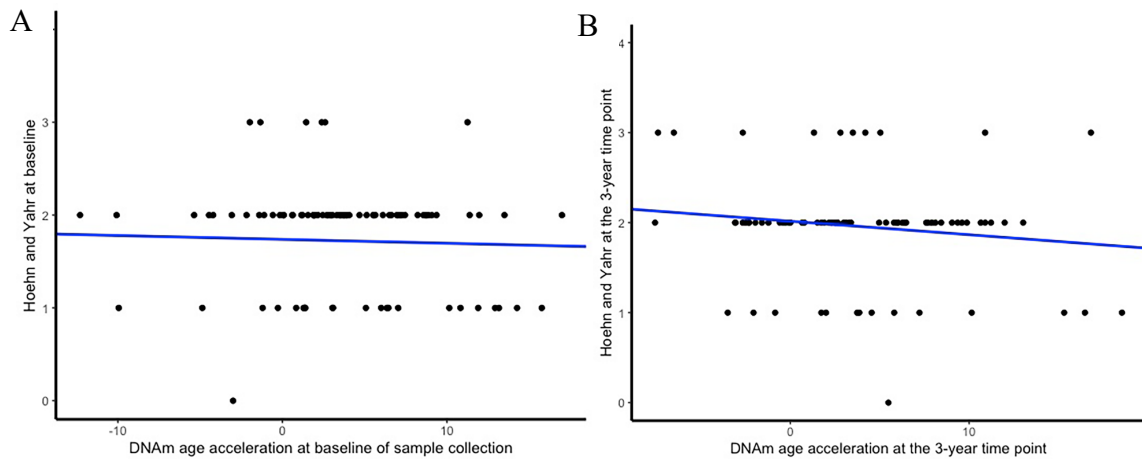

**Supplementary Fig 6.** Scatter plots of DNAm-age acceleration and the Hoehn and Yahr scale for *LRRK2* G2019S-carriers at (A) baseline (n=91,  $p > 0.05$ ) and (B) 3-year follow-up (n=77,  $p > 0.05$ ). P-values are adjusted for sex, relatedness and interval. The blue line represents the linear regression trend.

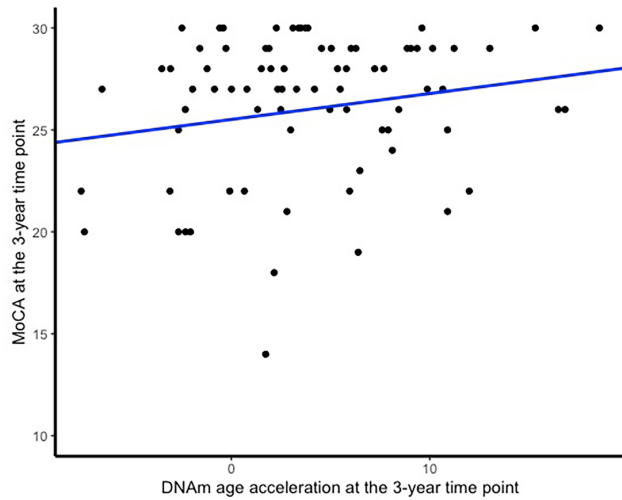

**Supplementary Fig 7.** Scatter plot of DNAm-age acceleration and MoCA score in G2019S-carriers at 3-year follow-up ( $p=0.079$ ,  $R^2=0.019$ ,  $B=0.13$ , adjusted for sex,  $n=78$ ).

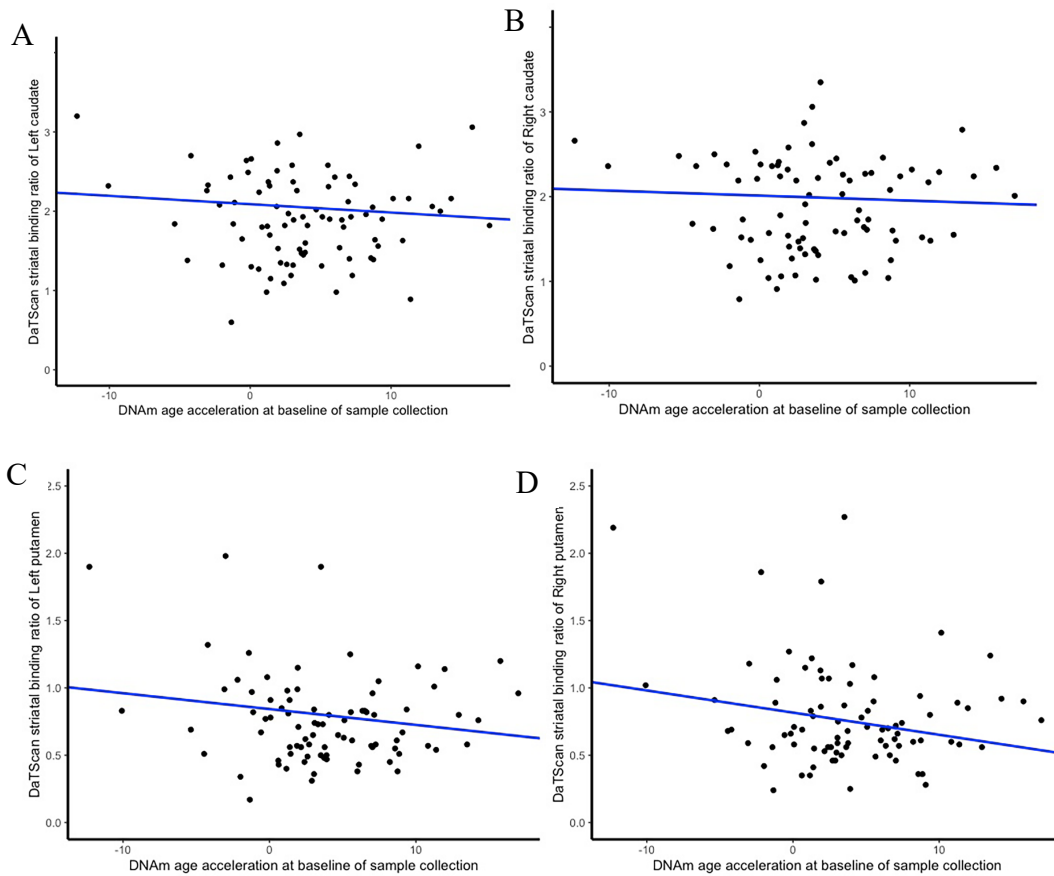

**Supplementary Fig 8.** Scatter plots of DNAm-age acceleration and DaTScan striatal binding ratio in the *LRRK2* G2019S-carriers ( $n=84$ ) at baseline in (A) left caudate ( $p=0.35$ ), (B) right caudate ( $p=0.63$ ), (C) left putamen ( $p=0.081$ ) and (D) right putamen ( $p=0.046$ ,  $R^2=0.02451$ ,  $B=-0.016$ ). P-values were adjusted for sex, family and interval).
